# Supplementary material for: The Impact of Co Doping and Annealing Temperature on the Electrochemical Performance and Structural Characteristics of SnO2 Nanoparticulate Photoanodes
Source: MDPI journal article supplement (doi:10.3390/ma15196534), 2022-09-21
Supplement: s1 [file s1]

## Supplementary Data

# The Impact of Co Doping and Annealing Temperature on the Electrochemical Performance and Structural Characteristics of SnO<sub>2</sub> Nanoparticulate Photoanodes

Abeer S. Altowyan <sup>1,\*</sup>, Mohamed Shaban <sup>2,3,\*</sup>, Khaled Abdelkarem <sup>3</sup> and Adel M. El Sayed <sup>4,\*</sup>

<sup>1</sup> Department of Physics, College of Science, Princess Nourah bint Abdulrahman University, P.O. Box 84428, Riyadh 11671, Saudi Arabia

<sup>2</sup> Physics Department, Faculty of Science, Islamic University of Madinah, P.O. Box 170, Al Madinah Al Monawara 42351, Saudi Arabia

<sup>3</sup> Nanophotonics and Applications (NPA) Lab, Department of Physics, Faculty of Science, Beni-Suef University, Beni-Suef 62514, Egypt

<sup>4</sup> Physics Department, Faculty of Science, Fayoum University, El Fayoum 63514, Egypt

\* Correspondence: asaltowyan@pnu.edu.sa (A.S.A.); mssfadel@aucegypt.edu (M.S.); ams06@fayoum.edu.eg (A.M.E.S.)

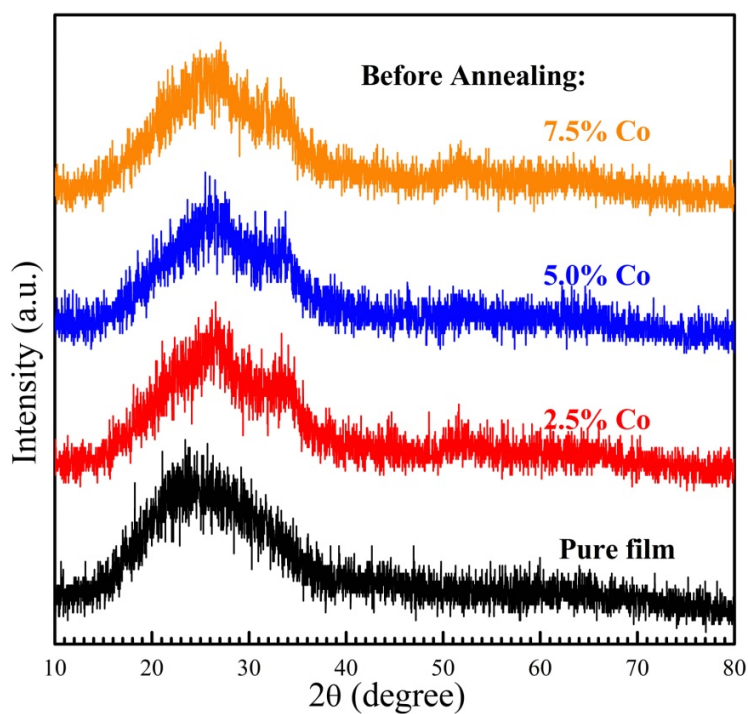

**Figure S1.** Shows XRD patterns of the as-deposited films (before annealing).

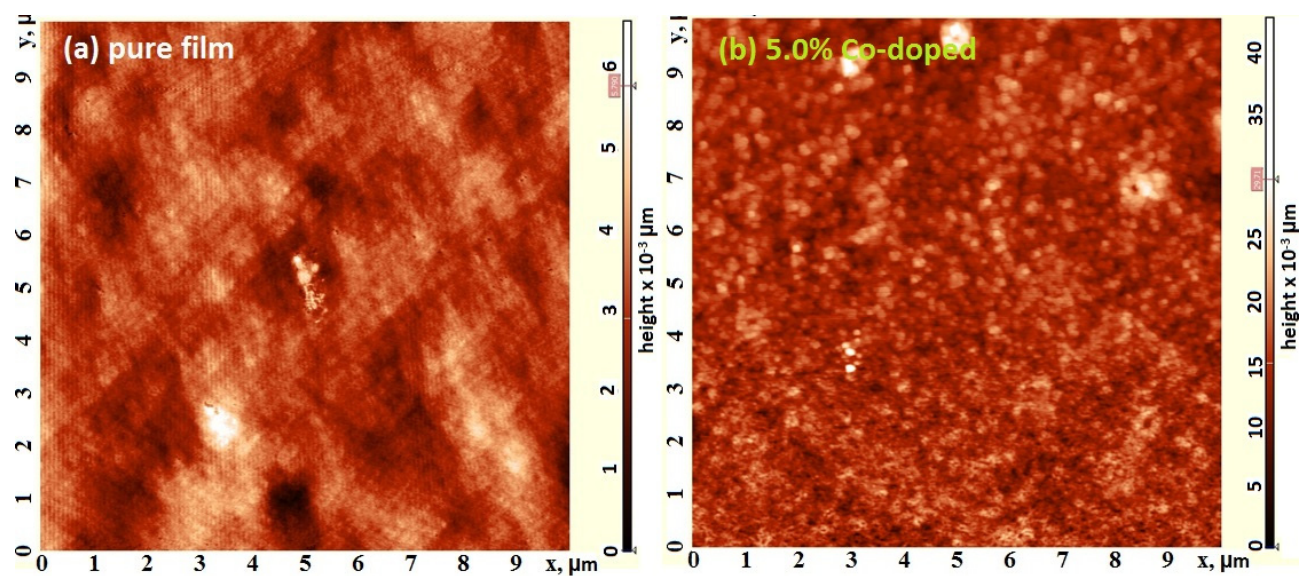

**Figure S2.** 2D AFM images for (a) pure and (b) 5.0% Co-doped films before annealing.
